# Supplementary material for: Template-free synthesis of Ni7S6hollow spheres with mesoporous shells for high performance supercapacitors
Source: Royal Society of Chemistry journal article supplement (doi:10.1039/c4ce02548b), 2015-01-01
Supplement: c4ce02548b1.pdf [file c4ce02548b1.pdf]

**Electronic Supplementary Information**

**Template-free Synthesis of Ni<sub>7</sub>S<sub>6</sub> Hollow Spheres with  
Mesoporous Shells for High Performance  
Supercapacitors**

Zhongchun Li<sup>a, b</sup>, Jie Han<sup>a,\*</sup>, Lei Fan<sup>a</sup> and Rong Guo<sup>a,\*</sup>

<sup>a</sup> School of Chemistry and Chemical Engineering, Yangzhou University, Yangzhou,  
225002, P. R. China

<sup>b</sup> School of Chemistry and Environment Engineering, Jiangsu University of  
Technology, Changzhou, 213001, P. R. China

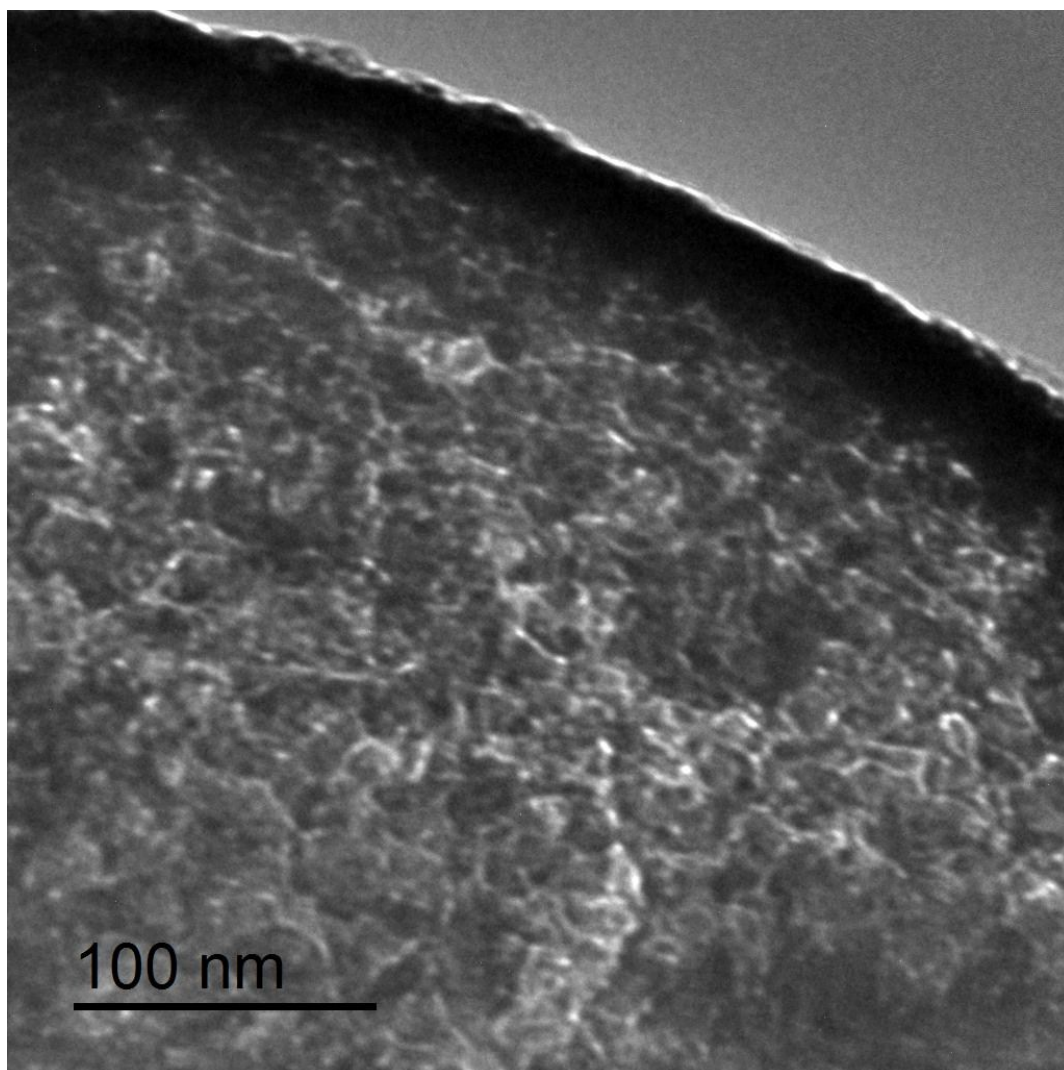

**Fig. S1** TEM image of  $\text{Ni}_7\text{S}_6$  mesoporous shell.

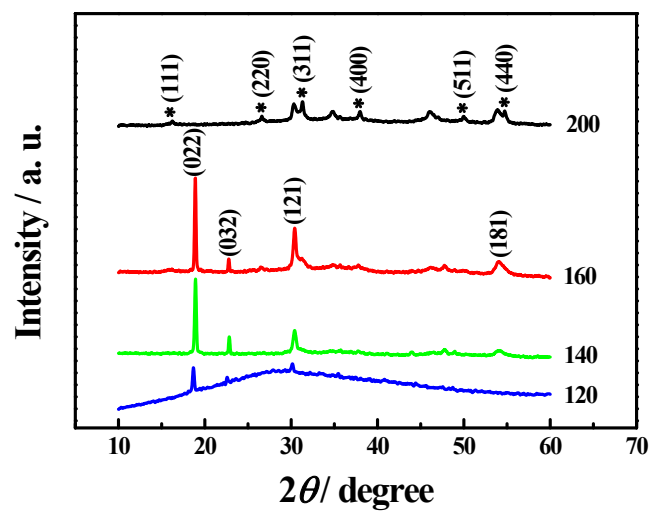

**Fig. S2** XRD patterns of samples obtained at different temperature (°C).

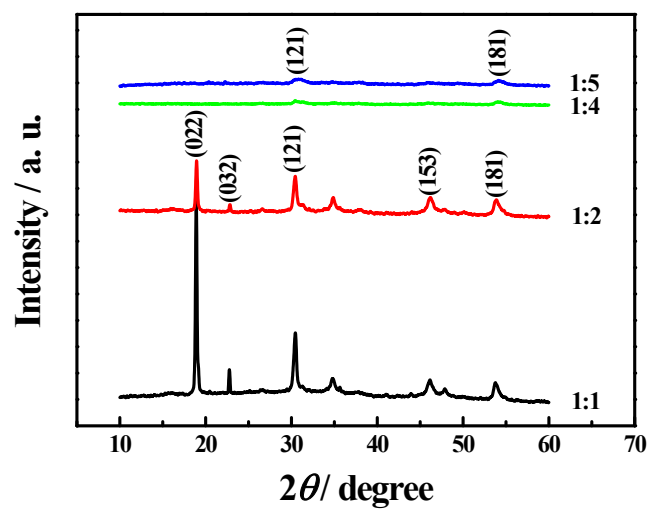

**Fig. S3** XRD patterns of samples prepared at various molar ratio of NCH/STC.

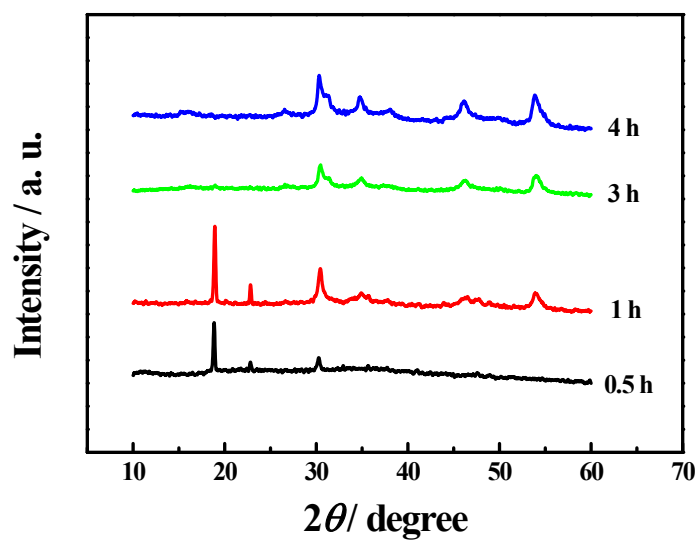

**Fig. S4** XRD patterns samples obtained at different reaction time (h): (a) 0.5, (b) 1, (c) 3, and (d) 4.
